# Supplementary material for: Regio- and stereo-selective polymerization of 1,3-butadiene catalyzed by phosphorus–nitrogen PN3-pincer cobalt(ii) complexes
Source: Royal Society of Chemistry journal article supplement (doi:10.1039/c6dt03722d), 2016-01-01
Supplement: c6dt03722d1.pdf [file c6dt03722d1.pdf]

## Supporting information

### **Regio- and stereo-selective polymerization of 1,3-butadiene catalyzed phosphorus-nitrogen PN<sup>3</sup>-pincer cobalt(II) complexes**

**Dirong Gong<sup>a,b</sup>, Xuequan Zhang<sup>c</sup>, Kuo-Wei Huang<sup>a\*</sup>**

*<sup>a</sup> King Abdullah University of Science and Technology, Division of Physical Sciences and Engineering and KAUST Catalysis Center, Thuwal 23955-6900, Saudi Arabia.*

*<sup>b</sup> Department of Polymer Science and Engineering, Faculty of Materials Science and Chemical Engineering, Ningbo University, Ningbo 315211, P. R. China*

*<sup>c</sup> Key Laboratory of Synthetic Rubber, Changchun Institute of Applied Chemistry, Chinese Academy of Sciences, 5625 Renmin Street, Changchun 130022, P. R. China.*

*hkw@kaust.edu.sa*

Content list:

1. **Table S1** Crystal data and structure refinements of complexes **CoCl<sub>2</sub>-H**, **CoCl<sub>2</sub>-Me**, **CoBr<sub>2</sub>-*i*Pr** and **CoI<sub>2</sub>-Me**
2. **Table S2** The selected bond length (Å) and angles (°) for complexes **CoCl<sub>2</sub>-H**, **CoCl<sub>2</sub>-Me**, **CoBr<sub>2</sub>-*i*Pr** and **CoI<sub>2</sub>-Me**
3. **Fig.S1** The <sup>1</sup>H NMR of obtained *cis*-1,4 polybutadiene (entry 1, *cis*-1,4 content: 98.4%)
4. **Fig.S2** The <sup>13</sup>C NMR of obtained *cis*-1,4 polybutadiene (entry 1, *cis*-1,4 content: 98.4%)
5. **Fig.S3** The <sup>1</sup>H NMR of obtained 1,2 polybutadiene (1,2 content: 89.9%)
6. **Fig.S4** The <sup>13</sup>C NMR of obtained 1,2 polybutadiene (1,2 content: 89.9%)

**Table S1** Crystal data and structure refinements of complexes **CoCl<sub>2</sub>-H**, **CoCl<sub>2</sub>-Me**,  
**CoBr<sub>2</sub>-<sup>i</sup>Pr** and **CoI<sub>2</sub>-Me**

|                                         | <b>CoCl<sub>2</sub>-H</b>                                          | <b>CoCl<sub>2</sub>-Me</b>                                         | <b>CoBr<sub>2</sub>-<sup>i</sup>Pr</b>                             | <b>CoI<sub>2</sub>-Me</b>                                         |
|-----------------------------------------|--------------------------------------------------------------------|--------------------------------------------------------------------|--------------------------------------------------------------------|-------------------------------------------------------------------|
| Formula                                 | C <sub>16</sub> H <sub>24</sub> Cl <sub>2</sub> CoN <sub>4</sub> P | C <sub>18</sub> H <sub>29</sub> Cl <sub>2</sub> CoN <sub>4</sub> P | C <sub>22</sub> H <sub>37</sub> Br <sub>2</sub> CoN <sub>4</sub> P | C <sub>18</sub> H <sub>29</sub> I <sub>2</sub> CoN <sub>4</sub> P |
| Molecular weight                        | 433.20                                                             | 462.26                                                             | 607.27                                                             | 645.16                                                            |
| Crystal system                          | triclinic                                                          | triclinic                                                          | orthorhombic                                                       | triclinic                                                         |
| Space group                             | P21/n                                                              | P21/C                                                              | P212121                                                            | P21/C                                                             |
| a (Å)                                   | 12.4579(4)                                                         | 16.2575(8)                                                         | 11.5226(7)                                                         | 16.0679(6)                                                        |
| b (Å)                                   | 12.4065(5)                                                         | 9.2445(4)                                                          | 12.0510(6)                                                         | 8.9042(4)                                                         |
| c (Å)                                   | 14.3704(6)                                                         | 15.8382(6)                                                         | 19.2018(9)                                                         | 17.2884(5)                                                        |
| α (deg)                                 | 90.00                                                              | 90.00                                                              | 90.00                                                              | 90.00                                                             |
| β (deg)                                 | 111.364(4)                                                         | 107.243(4)                                                         | 90.00                                                              | 103.574(3)                                                        |
| γ (deg)                                 | 90.00                                                              | 90.00                                                              | 90.00                                                              | 90.00                                                             |
| V (Å <sup>3</sup> )                     | 2068.45(14)                                                        | 2273.38(17)                                                        | 2666.3(2)                                                          | 2404.39(16)                                                       |
| Z                                       | 4                                                                  | 4                                                                  | 4                                                                  | 4                                                                 |
| D <sub>calcd</sub> (Mg/m <sup>3</sup> ) | 1.398                                                              | 1.351                                                              | 1.513                                                              | 1.520                                                             |
| Absorp coeff (mm <sup>-1</sup> )        | 1.171                                                              | 1.070                                                              | 3.717                                                              | 3.358                                                             |
| F(000)                                  | 900                                                                | 964                                                                | 1236                                                               | 857                                                               |
| Crystal size (mm)                       | 0.23×0.21×0.16                                                     | 0.25×0.15×0.12                                                     | 0.35×0.32×0.20                                                     | 0.23×0.21×0.11                                                    |
| θ Range (deg)                           | 3.04 to 29.52                                                      | 3.07 to 29.50                                                      | 2.71 to 28.82                                                      | 3.01 to 29.04                                                     |
| No. of reflns collected                 | 45703                                                              | 49833                                                              | 10252                                                              | 10648                                                             |
| No. of indep reflns                     | 5453<br>(R <sub>int</sub> = 0.0381)                                | 3998<br>(R <sub>int</sub> = 0.1107)                                | 5164<br>(R <sub>int</sub> = 0.038)                                 | 4981<br>(R <sub>int</sub> = 0.0339)                               |
| No. of data/<br>restraint/params        | 5453/0/223                                                         | 3998/0/243                                                         | 5164/0/281                                                         | 4981/0/243                                                        |
| GOF on F <sup>2</sup>                   | 1.049                                                              | 1.162                                                              | 1.006                                                              | 1.056                                                             |
| R <sub>1</sub> (I>2σ(I))                | 0.0418                                                             | 0.0425                                                             | 0.04                                                               | 0.0549                                                            |
| wR <sub>2</sub>                         | 0.0929                                                             | 0.2937                                                             | 0.0991                                                             | 0.0879                                                            |

**Table S2** The selected bond length (Å) and angles (°) for complexes **CoCl<sub>2</sub>-H**,  
**CoCl<sub>2</sub>-Me**, **CoBr<sub>2</sub>-*i*Pr** and **CoI<sub>2</sub>-Me**

| <b>X = Cl,<br/>Br or I</b> | <b>CoCl<sub>2</sub>-H</b> | <b>CoCl<sub>2</sub>-Me</b> | <b>CoBr<sub>2</sub>-<i>i</i>Pr</b> | <b>CoI<sub>2</sub>-Me</b> |
|----------------------------|---------------------------|----------------------------|------------------------------------|---------------------------|
| Bond distance (Å)          |                           |                            |                                    |                           |
| Co1-N1                     | 2.096 6(15)               | 2.112(8)                   | 2.101(4)                           | 2.138(3)                  |
| Co1-N4                     | 2.14 17(16)               | 2.104(10)                  | 2.170(4)                           | 2.098(4)                  |
| Co1-X2                     | 2.3034(5)                 | 2.313(3)                   | 2.4627(9)                          | 2.6818(6)                 |
| Co1-X1                     | 2.3044(5)                 | 2.339(3)                   | 2.4207(9)                          | 2.6519(7)                 |
| Co1-P                      | 2.5034(5)                 | 2.468(3)                   | 2.5058(15)                         | 2.4878(13)                |
| Bond angle (°)             |                           |                            |                                    |                           |
| N1-Co1-N4                  | 75.68(6)                  | 74.7(3)                    | 75.24(16)                          | 74.75(13)                 |
| N1-Co1-X1                  | 122.50(5)                 | 99.3(2)                    | 97.66(12)                          | 155.41(9)                 |
| N4-Co1-X2                  | 94.38(5)                  | 93.3(6)                    | 89.94(12)                          | 102.91(9)                 |
| N1-Co1-X1                  | 127.82(4)                 | 148.6(3)                   | 152.08(12)                         | 99.92(9)                  |
| N4-Co1-X1                  | 92.44(5)                  | 99.2(3)                    | 100.95(11)                         | 93.21(14)                 |
| X2-Co1-X1                  | 108.79(2)                 | 111.494(11)                | 110.08(4)                          | 104.66(2)                 |
| N1-Co1-P                   | 78. 97(4)                 | 77.8(2)                    | 78.27(11)                          | 76.97(9)                  |
| N4-Co1-P                   | 154.15(4)                 | 149.4(3)                   | 148.89(12)                         | 146.28(12)                |
| X2-Co1-P                   | 102.75(2)                 | 103.84(12)                 | 109.63(4)                          | 95.23(3)                  |
| X1-Co1-P                   | 100.004(19)               | 97.29(11)                  | 94.83(4)                           | 109.52(3)                 |

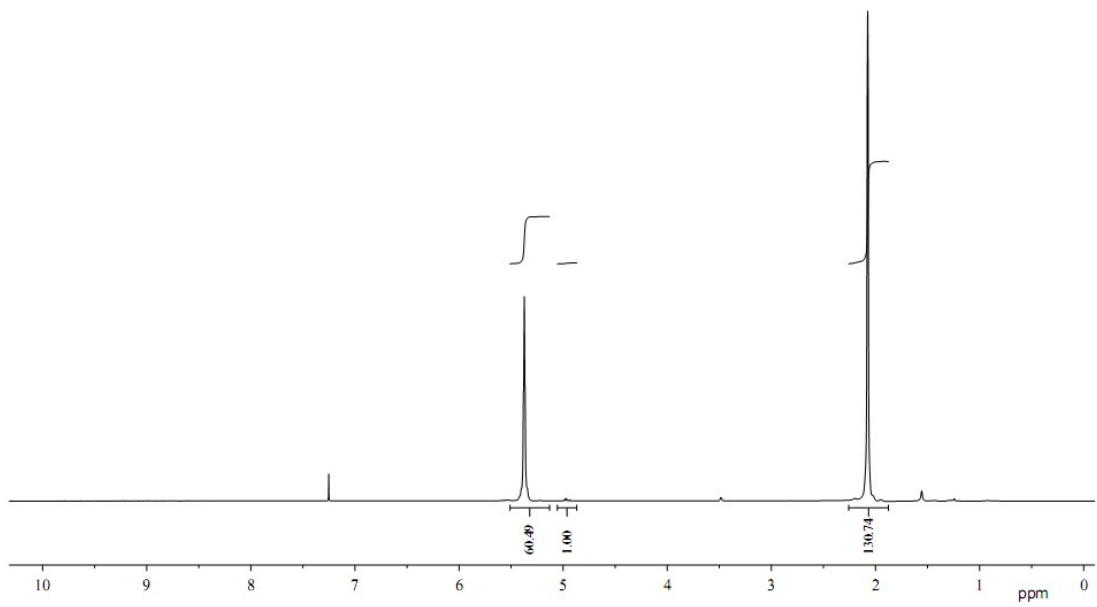

**Fig.S1** The <sup>1</sup>H NMR of obtained *cis*-1,4 polybutadiene (entry 1, *cis*-1,4 content: 98.4%)

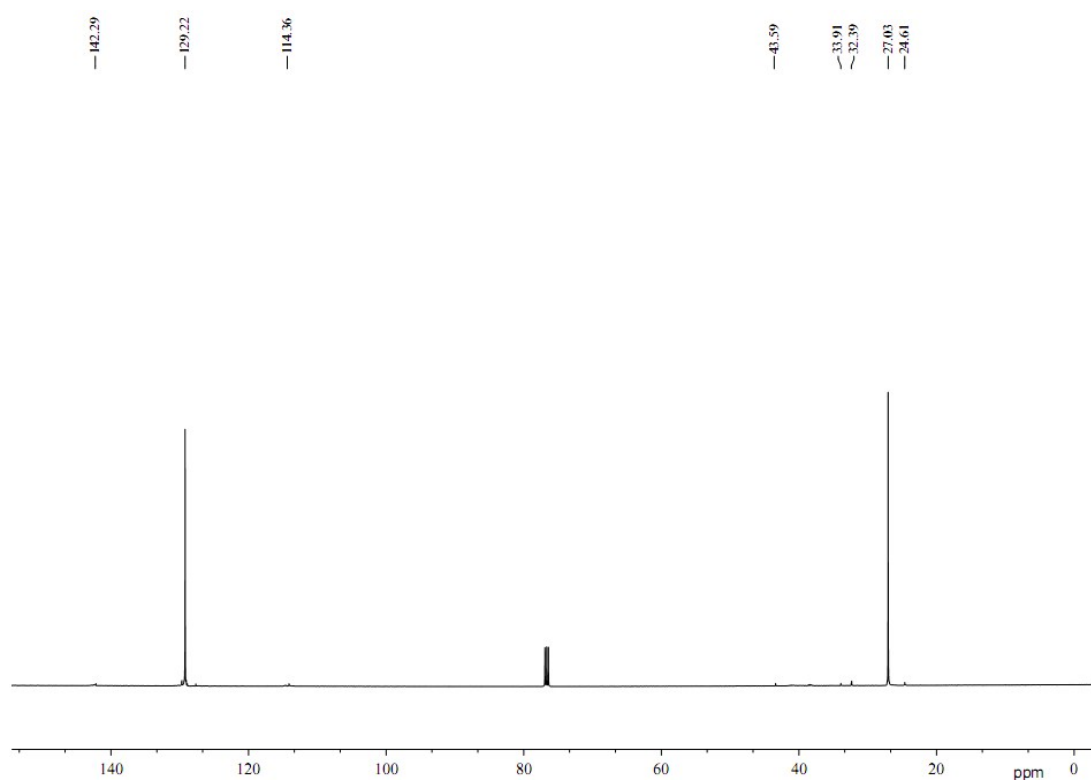

**Fig.S2** The  $^{13}\text{C}$  NMR of obtained *cis*-1,4 polybutadiene (entry 1, *cis*-1,4 content: 98.4%)

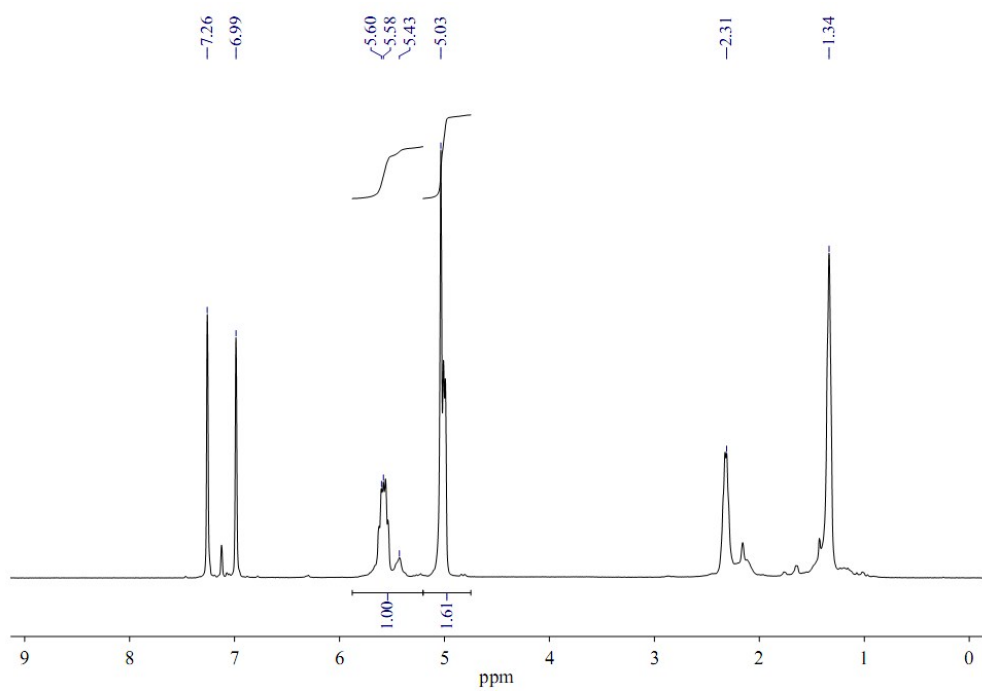

**Fig.S3** The  $^1\text{H}$  NMR of obtained 1,2-polybutadiene (1,2 content: 89.9%)

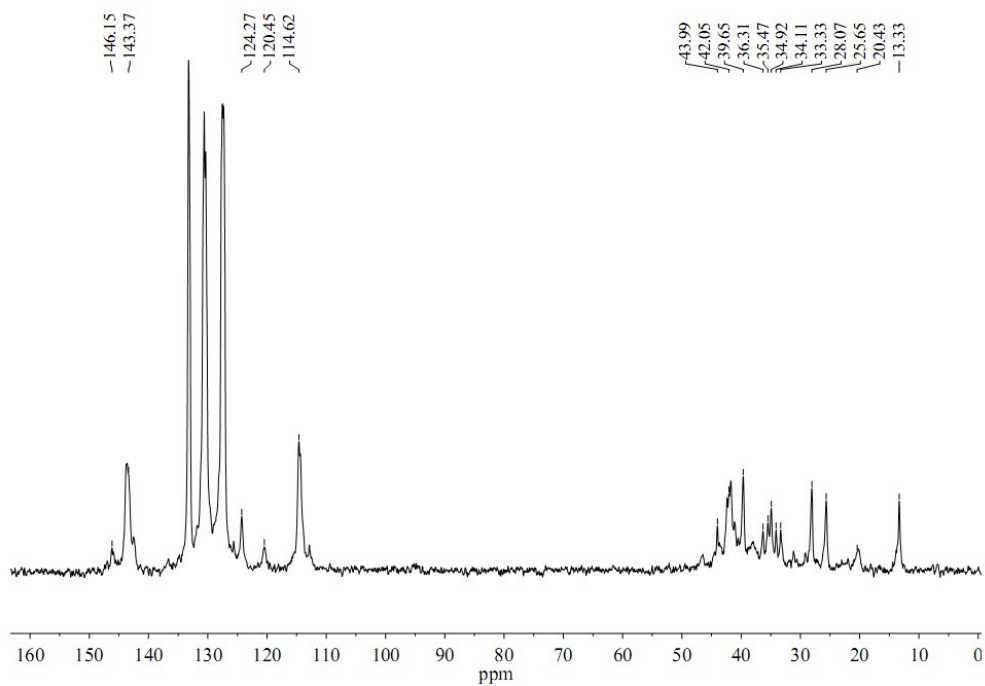

**Fig.S4** The  $^{13}\text{C}$  NMR of obtained 1,2-polybutadiene (1,2 content: 89.9%)
